# Supplementary material for: Genome-wide association study of agronomical and root-related traits in spring barley collection grown under field conditions
Source: PubMed Central journal article supplement (PMC9902773; doi:10.3389/fpls.2023.1077631), 2023-01-24
Supplement: Image_1.pdf [file Image_1.pdf]

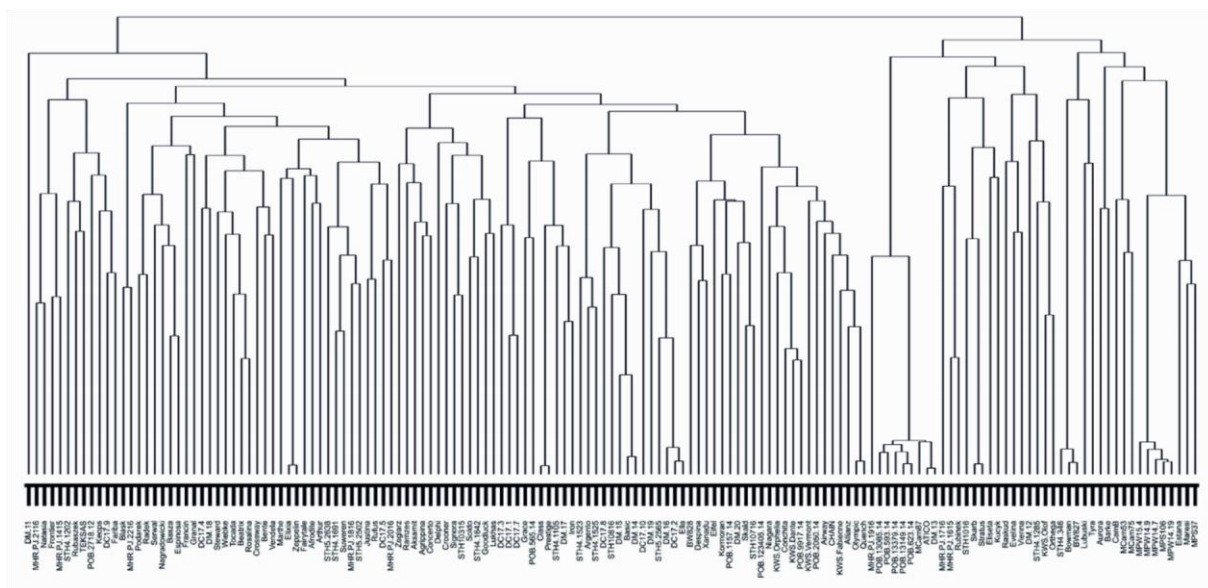

Supplementary Figure 1. Dendrogram of all 149 accessions constructed by hierarchical clustering using the average linkage method based on kinship matrix.
