# Supplementary material for: Genome-wide association study of agronomical and root-related traits in spring barley collection grown under field conditions
Source: Front Plant Sci. 2023 Jan 24;14:1077631. doi: 10.3389/fpls.2023.1077631 (PMC9902773; doi:10.3389/fpls.2023.1077631)
Supplement: Supplementary file 10 [file Table_9.xlsx]

## Sheet: Sheet 1
Supplementary Table 9. List of LD-blocks detected in the study.
							Indicator of significance of LD-block effects for trait (0/1)										LD-block effects for trait									Std. err. of LD-block effects for trait
Number	Name	Markers	Chromosome	Marker positions	LD-blocks combinations	Number of accessions	TB	RB	NPT	TNT	PH	LSp	GNSp	GWSp	TGW	Total number of significant effects	TB	RB	NPT	TNT	PH	LSp	GNSp	GWSp	TGW	TB	RB	NPT	TNT	PH	LSp	GNSp	GWSp	TGW
1	LD-b_1H_1	1H_263584_1H_270034_1H_2759844_1H_4333150_1H_4770577_1H_4770600	1H	263584|270034|2759844|4333150|4770577|4770600	A/A C/C A/A C/C T/T T/T|A/A C/C A/A G/G C/C C/C|A/A C/C T/T G/G C/C C/C|G/G T/T A/A C/C T/T T/T	11|8|63|8	0	0	0	0	0	0	0	0	0	0	-0.04|-0.05|-0.14|1.21	0.05|-0.07|-0.04|0.31	-0.02|0.06|-0.06|0.39	-0.09|0.11|-0.06|0.46	0.87|-0.22|-0.35|1.8	-0.29|-0.09|0.07|-0.04	-0.6|-0.04|0.11|0.01	-0.04|-0.01|0.01|-0.01	-0.81|-0.23|0.21|-0.3	0.6|0.61|0.39|0.62	0.09|0.09|0.06|0.09	0.29|0.29|0.19|0.3	0.3|0.3|0.19|0.31	0.99|0.99|0.64|1.01	0.17|0.17|0.11|0.17	0.41|0.41|0.26|0.42	0.03|0.03|0.02|0.03	0.8|0.8|0.52|0.82
2	LD-b_1H_2	1H_29069587_1H_29809969_1H_29810052	1H	29069587|29809969|29810052	C/C A/A G/G|T/T G/G A/A	20|108	0	0	0	0	1	0	0	0	0	1	0.93|-0.17	0.13|-0.02	0.2|-0.04	0.07|-0.01	2.36|-0.44	0.18|-0.03	-0.21|0.04	0|0	0.45|-0.08	0.29|0.29	0.04|0.04	0.15|0.15	0.16|0.16	0.47|0.47	0.09|0.09	0.21|0.21	0.01|0.01	0.37|0.37
3	LD-b_1H_3	1H_528992085_1H_528992149_1H_529198477_1H_529405071_1H_529872908	1H	528992085|528992149|529198477|529405071|529872908	C/C C/C A/A A/A C/C|T/T T/T C/C C/C T/T	125|12	0	0	0	0	0	0	0	0	1	1	-0.01|0.1	-0.01|0.13	-0.04|0.43	-0.05|0.49	-0.1|1.03	-0.01|0.12	0.06|-0.65	0.01|-0.08	0.3|-3.08	0.4|0.4	0.06|0.06	0.2|0.2	0.2|0.2	0.62|0.62	0.11|0.11	0.27|0.27	0.02|0.02	0.49|0.49
4	LD-b_1H_4	1H_544039452_1H_544591182_1H_544593070_1H_548174020_1H_548347412_1H_549000198_1H_549044977_1H_549126063_1H_549126117_1H_549126160_1H_549755187_1H_550152208_1H_550243383_1H_550544208_1H_550544410_1H_550793727_1H_550793729_1H_550832289_1H_550843533_1H_550851296_1H_550855484_1H_551355896_1H_551384482_1H_551525513_1H_551858749_1H_553910866_1H_553910877_1H_554363034_1H_554453487_1H_554453501_1H_554600…	1H	544039452|544591182|544593070|548174020|548347412|549000198|549044977|549126063|549126117|549126160|549755187|550152208|550243383|550544208|550544410|550793727|550793729|550832289|550843533|550851296|550855484|551355896|551384482|551525513|551858749|553910866|553910877|554363034|554453487|554453501|554600223|554602202	A/A G/G C/C G/G T/T T/T A/A G/G T/T T/T G/G A/A G/G T/T T/T G/G G/G C/C G/G T/T G/G T/T T/T C/C G/G C/C C/C G/G C/C G/G G/G C/C|G/G C/C A/A A/A C/C C/C T/T A/A C/C G/G A/A G/G A/A C/C C/C A/A T/T G/G A/A C/C A/A A/A G/G G/G A/A T/T T/T C/C A/A A/A A/A G/G|G/G C/C A/A A/A C/C C/C T/T A/A C/C G/G A/A G/G A/A C/T C/C A/A T/T G/G A/A C/C A/A A/A G/G G/G A/A T/T T/T C/C A/A A/A A/A G/G	21|10|22	0	0	0	0	0	0	0	0	0	0	-0.14|-1.09|0.63	-0.01|-0.04|0.03	-0.26|-0.76|0.6	-0.19|-0.88|0.58	1.25|0.21|-1.28	0.15|0.07|-0.17	0.08|0.85|-0.46	0|0.07|-0.03	-0.12|1.6|-0.61	0.55|0.63|0.44	0.09|0.1|0.07	0.26|0.3|0.21	0.26|0.3|0.21	0.71|0.82|0.57	0.14|0.16|0.11	0.35|0.41|0.28	0.02|0.03|0.02	0.76|0.87|0.6
5	LD-b_1H_5	1H_554781162_1H_558227495_1H_558227513	1H	554781162|558227495|558227513	C/C C/C C/G|C/C C/C G/G|C/C G/G C/C|T/T G/G C/C	68|29|8|22	0	0	0	0	0	0	0	0	0	0	0.15|-0.37|-0.31|0.15	0.02|0.02|-0.08|-0.06	0.03|-0.11|0.39|-0.1	-0.01|0.02|0.31|-0.1	0.26|0.65|-3|-0.57	0.06|-0.2|-0.26|0.15	-0.06|0.03|-0.69|0.41	0|-0.02|-0.03|0.03	0.24|-1.28|0.29|0.85	0.33|0.4|0.58|0.4	0.05|0.06|0.09|0.06	0.16|0.2|0.29|0.2	0.17|0.2|0.29|0.2	0.51|0.63|0.9|0.62	0.09|0.1|0.15|0.1	0.21|0.26|0.37|0.26	0.01|0.02|0.02|0.02	0.41|0.5|0.72|0.5
6	LD-b_2H_6	2H_1368968_2H_3729606	2H	1368968|3729606	A/A A/A|A/A G/G|A/G G/G	36|37|54	0	0	0	0	0	0	0	1	1	2	0.06|-0.72|0.45	-0.05|-0.01|0.04	-0.18|-0.44|0.42	-0.24|-0.35|0.4	0.35|0.67|-0.69	0.03|-0.04|0.01	0.35|0.19|-0.36	0.04|0|-0.03	1.56|-0.55|-0.67	0.28|0.3|0.3	0.04|0.05|0.05	0.14|0.15|0.14	0.14|0.15|0.15	0.45|0.48|0.47	0.08|0.09|0.09	0.19|0.21|0.2	0.01|0.01|0.01	0.36|0.38|0.38
7	LD-b_2H_7	2H_14745634_2H_15019351_2H_15019363_2H_15036816_2H_16421680_2H_16946037_2H_16946042	2H	14745634|15019351|15019363|15036816|16421680|16946037|16946042	C/C G/G G/G C/T T/T A/A G/G|G/G A/A C/C C/C C/C C/C T/T|G/G A/A C/C C/C T/T C/C T/T	38|54|20	0	1	0	0	1	0	0	0	0	2	0.42|-0.39|0.24	0.11|-0.1|0.06	0.05|0.03|-0.19	0.02|0.05|-0.18	0.83|-1.26|1.83	-0.1|-0.1|0.46	-0.07|-0.22|0.73	0.01|-0.02|0.02	0.92|-0.38|-0.72	0.35|0.29|0.48	0.06|0.05|0.08	0.19|0.15|0.25	0.19|0.15|0.26	0.58|0.47|0.8	0.11|0.09|0.15	0.27|0.22|0.37	0.02|0.01|0.02	0.44|0.36|0.6
8	LD-b_2H_8	2H_8788971_2H_8905766_2H_9630740_2H_10853862_2H_10853885_2H_10884752_2H_15019339_2H_15025942	2H	8788971|8905766|9630740|10853862|10853885|10884752|15019339|15025942	A/A G/G C/C C/C A/A G/G C/C T/T|T/T C/C G/G T/T C/C A/A T/T C/C	56|26	0	0	0	0	0	0	0	0	0	0	0.3|-0.64	0.05|-0.1	0.08|-0.17	0.05|-0.12	0.76|-1.65	0|-0.01	-0.01|0.02	0|0.01	-0.15|0.32	0.36|0.36	0.06|0.06	0.19|0.19	0.19|0.19	0.51|0.51	0.1|0.1	0.21|0.21	0.01|0.01	0.44|0.44
9	LD-b_2H_9	2H_19659425_2H_21324822	2H	19659425|21324822	C/C A/A|C/C T/T|T/T T/T	36|34|42	0	0	0	0	0	0	0	0	0	0	-1.03|0.52|0.46	-0.13|0.05|0.07	-0.56|0.33|0.21	-0.47|0.31|0.16	0.58|0.48|-0.88	0.11|0.03|-0.12	0.17|0.13|-0.25	0.01|0|-0.01	0.32|-0.51|0.14	0.31|0.33|0.33	0.05|0.05|0.05	0.15|0.16|0.16	0.15|0.17|0.16	0.49|0.53|0.52	0.09|0.09|0.09	0.22|0.23|0.23	0.01|0.01|0.01	0.39|0.43|0.42
10	LD-b_2H_10	2H_20087534_2H_20094997_2H_20095006_2H_20095029_2H_21581482	2H	20087534|20094997|20095006|20095029|21581482	A/A T/T C/C T/T A/A|A/A T/T C/C T/T G/G|G/G G/G T/T G/G A/A	8|60|62	0	1	0	0	0	0	0	0	0	1	0.38|0.54|-0.57	-0.07|0.1|-0.09	0.23|0.2|-0.22	0.22|0.16|-0.19	-0.37|0.2|-0.15	-0.3|0.02|0.02	0.32|0.09|-0.13	0.02|0.01|-0.01	0.73|0.06|-0.15	0.51|0.33|0.32	0.08|0.05|0.05	0.26|0.17|0.16	0.27|0.17|0.17	0.83|0.53|0.51	0.14|0.09|0.09	0.35|0.22|0.22	0.02|0.01|0.01	0.68|0.43|0.42
11	LD-b_2H_11	2H_758675532_2H_758851189_2H_759410106_2H_759410121_2H_760134815_2H_760134836	2H	758675532|758851189|759410106|759410121|760134815|760134836	C/C T/T C/C G/G A/A T/T|C/G C/C G/G C/C G/G A/A|G/G C/C G/G C/C G/G A/A	42|25|45	0	1	0	0	0	0	0	0	0	1	0.7|-0.12|-0.59	0.15|-0.07|-0.11	0.32|-0.04|-0.28	0.31|0|-0.29	-0.09|-0.14|0.16	0.15|0.01|-0.15	-0.15|0.14|0.06	-0.01|0|0.01	-0.3|-0.18|0.38	0.32|0.33|0.3	0.04|0.05|0.04	0.16|0.16|0.15	0.16|0.17|0.15	0.51|0.53|0.48	0.09|0.09|0.08	0.22|0.22|0.2	0.01|0.01|0.01	0.39|0.41|0.37
12	LD-b_2H_12	2H_731018485_2H_731018511	2H	731018485|731018511	A/A T/T|G/A A/T|G/G A/A	42|34|36	0	0	0	0	0	0	0	0	0	0	0.2|0.17|-0.39	0.11|-0.01|-0.12	0.07|0.19|-0.26	0.18|0.05|-0.26	-0.01|-0.57|0.55	-0.02|-0.06|0.08	-0.18|-0.17|0.36	-0.01|0|0.02	-0.3|0.14|0.22	0.29|0.32|0.34	0.04|0.05|0.05	0.14|0.16|0.17	0.14|0.16|0.16	0.42|0.48|0.5	0.08|0.09|0.1	0.19|0.22|0.23	0.01|0.01|0.01	0.35|0.4|0.42
13	LD-b_2H_13	2H_677133368_2H_677251322	2H	677133368|677251322	C/C T/T|T/T C/C	101|16	0	0	0	0	0	0	1	1	0	2	0.03|-0.18	0.02|-0.1	0.05|-0.34	0.06|-0.41	0.02|-0.15	-0.07|0.44	-0.18|1.11	-0.01|0.07	-0.14|0.89	0.31|0.31	0.05|0.05	0.15|0.15	0.16|0.16	0.49|0.49	0.08|0.08	0.2|0.2	0.01|0.01	0.37|0.37
14	LD-b_2H_14	2H_679425817_2H_682241583_2H_682572363_2H_682669818_2H_682930176_2H_683737253_2H_685486571_2H_685486589_2H_685782729	2H	679425817|682241583|682572363|682669818|682930176|683737253|685486571|685486589|685782729	C/C A/A G/G G/G T/T C/C G/G T/T A/A|T/T T/T C/C A/A A/A T/T A/A G/G T/T	104|8	0	0	0	0	0	0	0	0	0	0	0.06|-0.81	0.01|-0.08	0.03|-0.41	0.02|-0.27	-0.07|0.95	0|0.06	0.07|-0.97	0.01|-0.1	0.24|-3.17	0.75|0.64	0.11|0.1	0.38|0.32	0.39|0.33	1.12|0.96	0.21|0.18	0.46|0.39	0.03|0.02	0.86|0.73
15	LD-b_2H_15	2H_679676681_2H_680107471_2H_680441285_2H_680982970_2H_681051840_2H_685911713_2H_687293981_2H_687347623_2H_687351505_2H_687997423_2H_688002977_2H_688553911_2H_688554027	2H	679676681|680107471|680441285|680982970|681051840|685911713|687293981|687347623|687351505|687997423|688002977|688553911|688554027	A/A A/A T/T C/C T/T T/T G/G G/G A/A A/A C/C A/A T/T|T/T G/G C/C T/T G/G A/A A/A A/A G/G C/C T/T G/G C/C	31|68	0	0	0	0	0	0	1	1	0	2	0.14|-0.06	-0.03|0.01	-0.23|0.1	-0.27|0.12	-0.78|0.35	0.25|-0.11	0.74|-0.34	0.05|-0.02	0.99|-0.45	0.26|0.24	0.04|0.04	0.12|0.12	0.13|0.12	0.37|0.35	0.07|0.06	0.16|0.15	0.01|0.01	0.33|0.31
16	LD-b_2H_16	2H_697283040_2H_697283064	2H	697283040|697283064	A/A A/A|T/T T/T	88|14	0	0	0	0	0	0	0	0	0	0	-0.04|0.23	0.01|-0.05	-0.05|0.31	-0.04|0.28	0.34|-2.15	0.03|-0.2	0.03|-0.19	0|0	-0.1|0.62	0.28|0.28	0.05|0.05	0.15|0.15	0.16|0.16	0.5|0.5	0.09|0.09	0.2|0.2	0.01|0.01	0.37|0.37
17	LD-b_2H_17	2H_694598704_2H_701643974	2H	694598704|701643974	C/C T/T|T/T G/G|T/T T/T	90|8|24	0	0	0	0	0	0	1	1	0	2	-0.02|-0.32|0.19	-0.01|-0.04|0.04	0.07|-0.73|-0.02	0.09|-0.99|-0.01	0.12|0.49|-0.61	-0.01|0.31|-0.08	-0.19|1.88|0.1	-0.02|0.1|0.03	-0.39|0.63|1.24	0.31|0.5|0.37	0.05|0.08|0.06	0.15|0.24|0.18	0.15|0.24|0.18	0.51|0.83|0.61	0.09|0.15|0.11	0.21|0.34|0.25	0.01|0.02|0.02	0.4|0.65|0.48
18	LD-b_2H_18	2H_719314404_2H_721639257_2H_721639266	2H	719314404|721639257|721639266	A/A T/T C/C|G/G A/A T/T	47|54	0	0	0	0	1	0	0	0	0	1	0.13|-0.11	-0.03|0.02	-0.07|0.06	-0.1|0.09	1.36|-1.18	0.12|-0.1	0.46|-0.4	0.01|-0.01	-0.37|0.32	0.29|0.29	0.04|0.04	0.14|0.14	0.14|0.14	0.44|0.44	0.07|0.07	0.2|0.2	0.01|0.01	0.34|0.34
19	LD-b_2H_19	2H_723220293_2H_723220301	2H	723220293|723220301	A/A A/A|G/G G/G	69|51	0	0	0	0	1	0	0	0	0	1	-0.01|0.01	0.01|-0.02	0.1|-0.14	0.08|-0.11	-0.89|1.21	-0.08|0.11	-0.05|0.06	0|0	0.09|-0.12	0.23|0.23	0.03|0.03	0.12|0.12	0.12|0.12	0.37|0.37	0.07|0.07	0.16|0.16	0.01|0.01	0.29|0.29
20	LD-b_2H_20	2H_752214402_2H_752619377_2H_752978192_2H_752978213_2H_753121846_2H_753121883_2H_753227443_2H_754455208_2H_754499274_2H_757683951_2H_757683960	2H	752214402|752619377|752978192|752978213|753121846|753121883|753227443|754455208|754499274|757683951|757683960	A/A C/C C/C G/G T/T C/C G/G A/A G/G C/C C/C|G/G T/T G/G T/T C/C G/G A/A G/G A/A T/T T/T	117|9	0	0	0	0	0	0	0	0	0	0	-0.05|0.65	-0.01|0.19	-0.04|0.55	-0.05|0.61	0.05|-0.69	0.01|-0.16	0.03|-0.39	0|-0.02	-0.01|0.11	0.37|0.37	0.06|0.05	0.18|0.18	0.19|0.19	0.59|0.58	0.1|0.1	0.24|0.24	0.02|0.01	0.48|0.48
21	LD-b_3H_21	3H_39645580_3H_40051823_3H_42399836_3H_42759732_3H_42759815_3H_44040353_3H_44040409_3H_44040448_3H_44043677	3H	39645580|40051823|42399836|42759732|42759815|44040353|44040409|44040448|44043677	C/C C/C T/T C/C C/C G/G T/T T/T C/C|G/G G/G C/C T/T G/G A/A A/A C/C G/G	73|9	0	0	0	0	0	0	0	0	0	0	-0.12|0.97	-0.02|0.18	-0.07|0.61	-0.07|0.59	-0.16|1.33	0.03|-0.24	0.09|-0.77	0|-0.04	0.02|-0.15	0.37|0.37	0.06|0.06	0.2|0.2	0.2|0.2	0.59|0.59	0.12|0.12	0.27|0.27	0.02|0.02	0.47|0.47
22	LD-b_3H_22	3H_345392670_3H_345392703	3H	345392670|345392703	C/C A/A|C/T A/C|T/T A/C	61|44|14	0	0	0	0	0	0	0	1	0	1	-0.32|0.42|0.06	0|0.02|-0.06	0.01|0.04|-0.17	0.03|0.03|-0.21	0.31|-0.39|-0.13	-0.18|0.18|0.22	-0.39|0.4|0.46	-0.03|0.03|0.04	-0.72|0.61|1.21	0.3|0.3|0.39	0.04|0.04|0.06	0.15|0.15|0.2	0.16|0.16|0.2	0.48|0.48|0.62	0.09|0.09|0.11	0.2|0.2|0.26	0.01|0.01|0.02	0.39|0.39|0.5
23	LD-b_3H_23	3H_677530442_3H_677530476_3H_677530478_3H_677530491_3H_677740161_3H_678373587	3H	677530442|677530476|677530478|677530491|677740161|678373587	C/C C/C T/T T/T T/T A/A|T/T T/T C/C C/C C/C T/T	107|30	0	0	0	0	0	0	0	0	0	0	-0.05|0.19	-0.02|0.07	0.01|-0.02	0.03|-0.1	-0.17|0.62	-0.03|0.11	-0.05|0.16	0|-0.01	0.22|-0.8	0.23|0.23	0.04|0.04	0.12|0.12	0.12|0.12	0.36|0.36	0.07|0.07	0.16|0.16	0.01|0.01	0.29|0.29
24	LD-b_4H_24	4H_1035537_4H_1035542_4H_1105463_4H_1258103	4H	1035537|1035542|1105463|1258103	C/C A/A A/A A/A|C/C G/G A/A G/G|T/T G/G A/A G/G|T/T G/G G/G G/G	19|21|14|64	0	0	0	0	0	0	0	0	0	0	0.41|0.37|-0.43|-0.15	0.13|0.05|0.02|-0.06	0.02|0.31|-0.23|-0.06	-0.05|0.17|-0.17|0	0.67|-0.86|0.62|-0.05	0.01|-0.09|-0.06|0.04	0.31|-0.48|0.08|0.05	0.02|-0.02|0|0	0.57|0.07|0.13|-0.22	0.41|0.42|0.47|0.31	0.06|0.06|0.07|0.05	0.21|0.21|0.24|0.16	0.22|0.22|0.25|0.17	0.64|0.64|0.71|0.48	0.12|0.12|0.14|0.09	0.28|0.28|0.31|0.21	0.02|0.02|0.02|0.01	0.5|0.5|0.56|0.37
25	LD-b_4H_25	4H_12458754_4H_12458769_4H_12458771_4H_19386793_4H_21438658	4H	12458754|12458769|12458771|19386793|21438658	C/C C/C C/C C/C C/C|C/C C/C C/C T/T G/G|T/T T/T G/G C/C C/C|T/T T/T G/G T/T G/G	68|21|9|32	0	0	0	0	0	0	0	0	0	0	-0.27|-0.11|1.73|0.17	-0.04|0.03|0.17|0.01	-0.07|-0.12|0.88|-0.03	-0.06|-0.15|0.9|-0.04	-0.25|0.35|-0.31|0.4	0.02|0.09|-0.01|-0.1	-0.18|0.04|0.5|0.22	-0.01|0.01|0.04|0.01	-0.24|0.27|0.83|0.09	0.33|0.44|0.6|0.36	0.05|0.07|0.09|0.05	0.16|0.21|0.3|0.18	0.17|0.22|0.3|0.18	0.53|0.7|0.97|0.58	0.09|0.12|0.17|0.1	0.21|0.28|0.38|0.23	0.01|0.02|0.02|0.01	0.4|0.52|0.72|0.43
26	LD-b_4H_26	4H_497919453_4H_501332820_4H_517029083	4H	497919453|501332820|517029083	A/A G/G G/G|G/G A/A C/C	138|8	0	1	0	0	0	0	0	0	0	1	-0.09|1.61	-0.02|0.41	-0.05|0.85	-0.04|0.71	-0.01|0.18	0|-0.02	0.04|-0.61	0|-0.02	-0.04|0.63	0.38|0.38	0.05|0.05	0.19|0.19	0.19|0.19	0.61|0.61	0.11|0.11	0.26|0.26	0.02|0.02	0.49|0.49
27	LD-b_4H_27	4H_59976953_4H_60411991_4H_62857157_4H_64387263_4H_64677952_4H_72416505_4H_75189014_4H_347063114_4H_348948125_4H_462951792	4H	59976953|60411991|62857157|64387263|64677952|72416505|75189014|347063114|348948125|462951792	C/C G/G T/T C/C G/G C/C C/C A/A A/A A/A|C/C G/G T/T C/C G/G G/G T/T G/G G/G G/G|T/T C/C C/C T/T A/A G/G T/T G/G G/G G/G	15|8|71	0	0	0	0	0	0	0	0	0	0	-0.67|-0.07|0.15	-0.19|-0.03|0.04	-0.35|0.07|0.07	-0.32|-0.09|0.08	0.07|0.49|-0.07	0.18|0.26|-0.07	0.48|0.21|-0.13	0.02|0|0	-0.01|-0.57|0.07	0.64|0.63|0.42	0.08|0.08|0.06	0.31|0.3|0.2	0.32|0.31|0.21	0.92|0.9|0.6	0.18|0.17|0.11	0.4|0.39|0.26	0.03|0.02|0.02	0.75|0.73|0.49
28	LD-b_4H_28	4H_637548990_4H_637549014	4H	637548990|637549014	A/A G/G|A/G G/A	97|37	0	0	0	0	1	0	0	0	0	1	-0.01|0.02	-0.01|0.02	0.07|-0.17	0.05|-0.14	-0.94|2.46	-0.02|0.06	-0.17|0.44	-0.01|0.02	-0.09|0.25	0.23|0.21	0.03|0.03	0.11|0.1	0.12|0.11	0.33|0.31	0.06|0.06	0.15|0.14	0.01|0.01	0.29|0.27
29	LD-b_4H_29	4H_626405249_4H_626405278_4H_626861924	4H	626405249|626405278|626861924	A/A T/T C/C|A/A T/T G/G|T/T C/C C/C	11|36|78	0	0	0	0	0	0	0	0	0	0	-0.31|-0.02|0.05	-0.04|-0.11|0.06	-0.09|-0.14|0.08	-0.29|-0.22|0.14	0.96|0.18|-0.22	0.03|0.14|-0.07	-0.56|0.73|-0.26	0|0.04|-0.02	1.16|0.34|-0.32	0.83|0.5|0.5	0.13|0.08|0.08	0.41|0.24|0.24	0.41|0.25|0.25	1.31|0.79|0.79	0.22|0.13|0.13	0.53|0.32|0.32	0.03|0.02|0.02	1.02|0.62|0.62
30	LD-b_4H_30	4H_601707523_4H_604439135_4H_604439138_4H_604444452_4H_604444465_4H_604913807	4H	601707523|604439135|604439138|604444452|604444465|604913807	A/A A/A T/T G/G A/A C/C|C/C G/G C/C C/C G/G T/T	53|37	0	0	0	0	0	0	1	0	0	1	0.04|-0.05	-0.03|0.05	-0.04|0.06	-0.08|0.11	0.38|-0.55	0.09|-0.14	0.48|-0.68	0.02|-0.03	-0.27|0.38	0.29|0.29	0.04|0.04	0.14|0.14	0.14|0.14	0.38|0.38	0.07|0.07	0.16|0.16	0.01|0.01	0.35|0.35
31	LD-b_4H_31	4H_604932961_4H_605366495_4H_605366496_4H_605366570_4H_605366579_4H_605366593_4H_605370137_4H_605496851_4H_608059152_4H_611630037	4H	604932961|605366495|605366496|605366570|605366579|605366593|605370137|605496851|608059152|611630037	C/C G/G C/C C/C A/A G/G C/C G/G C/C A/A|C/C G/G C/C C/C A/A G/G C/C G/G T/T G/G|C/C T/T T/T T/T C/C C/C A/A A/A T/T A/A|C/C T/T T/T T/T C/C C/C A/A A/A T/T G/G|G/G G/G C/C C/C A/A G/G C/C G/G C/C A/A|G/G G/G C/C C/C A/A G/G C/C G/G T/T A/A	17|36|12|32|20|20	0	0	0	0	1	0	1	0	0	2	0.39|0.01|-0.03|0.4|-0.29|-0.68	-0.08|0.04|0|0.03|0.01|-0.06	0.13|-0.13|-0.03|-0.03|0.34|-0.14	0.19|-0.15|0.09|-0.16|0.42|-0.11	0.63|0.7|1.21|1.09|-4.01|-0.25	-0.05|0.01|0.19|0.19|-0.51|0.12	0.7|-0.47|0.2|0.67|-0.79|-0.15	0.03|-0.01|0|0.03|-0.04|-0.01	-0.4|0.53|-0.47|0.01|-0.18|-0.16	0.55|0.41|0.54|0.36|0.46|0.46	0.08|0.06|0.08|0.05|0.07|0.07	0.28|0.21|0.27|0.18|0.23|0.23	0.28|0.21|0.27|0.18|0.23|0.23	0.77|0.57|0.74|0.5|0.64|0.63	0.15|0.11|0.14|0.1|0.12|0.12	0.34|0.25|0.33|0.22|0.28|0.28	0.02|0.02|0.02|0.01|0.02|0.02	0.71|0.53|0.68|0.46|0.59|0.58
32	LD-b_4H_32	4H_621440405_4H_621440407_4H_621551402_4H_621710599_4H_622128823_4H_626405290	4H	621440405|621440407|621551402|621710599|622128823|626405290	A/A G/G A/A G/G C/C C/C|G/G A/A G/G C/C T/T C/C|G/G A/A G/G C/C T/T G/G	63|15|50	0	0	0	0	0	0	0	0	0	0	0.44|-0.86|-0.29	0.1|-0.02|-0.12	0.19|-0.21|-0.18	0.19|-0.1|-0.2	0.12|-0.38|-0.03	-0.03|-0.14|0.08	-0.12|-0.71|0.36	0|-0.06|0.02	0.32|-1.57|0.06	0.28|0.39|0.34	0.04|0.06|0.05	0.14|0.2|0.17	0.15|0.2|0.18	0.47|0.64|0.56	0.08|0.12|0.1	0.2|0.28|0.24	0.01|0.02|0.01	0.36|0.5|0.43
33	LD-b_4H_33	4H_635931289_4H_635931325	4H	635931289|635931325	A/A T/T|G/G A/A	122|16	0	0	0	0	0	0	1	0	0	1	-0.01|0.11	0.02|-0.14	0.02|-0.16	0.02|-0.13	-0.19|1.42	-0.05|0.39	-0.14|1.06	-0.01|0.05	-0.01|0.06	0.28|0.28	0.04|0.04	0.14|0.14	0.15|0.15	0.45|0.45	0.08|0.08	0.19|0.19	0.01|0.01	0.37|0.37
34	LD-b_4H_34	4H_637548982_4H_637549028	4H	637548982|637549028	C/C G/T|C/T G/G|C/T G/T|T/T G/G	8|40|27|56	0	0	0	0	0	0	0	0	0	0	-0.5|-0.42|0.48|0.14	0.3|-0.05|0.04|-0.03	-0.45|-0.15|0.29|0.03	0.27|-0.16|0.26|-0.05	1.68|1.14|-1.04|-0.56	-0.05|-0.09|0.23|-0.04	-0.19|-0.05|0.01|0.06	-0.03|-0.01|-0.02|0.02	-1.67|-0.59|-0.87|1.08	0.82|0.37|0.43|0.4	0.12|0.05|0.06|0.06	0.4|0.18|0.21|0.2	0.42|0.19|0.22|0.21	1.27|0.58|0.67|0.63	0.23|0.11|0.12|0.11	0.57|0.26|0.3|0.28	0.03|0.02|0.02|0.02	1|0.46|0.52|0.49
35	LD-b_5H_35	5H_41668430_5H_49864229_5H_65145772_5H_65145785_5H_69380671	5H	41668430|49864229|65145772|65145785|69380671	A/A A/A A/A A/A T/T|T/T G/G G/G T/T C/C	50|58	0	0	0	0	0	0	0	0	0	0	0.21|-0.18	-0.02|0.01	0.15|-0.13	0.27|-0.23	-0.43|0.37	-0.03|0.03	-0.07|0.06	0|0	0.02|-0.01	0.26|0.29	0.04|0.04	0.12|0.14	0.13|0.14	0.39|0.42	0.07|0.08	0.18|0.19	0.01|0.01	0.3|0.33
36	LD-b_5H_36	5H_69460142_5H_69460232	5H	69460142|69460232	C/C T/T|T/T C/C	69|39	0	0	0	0	0	0	0	0	0	0	0.45|-0.8	0.05|-0.09	0.33|-0.58	0.39|-0.69	-0.49|0.87	-0.01|0.02	-0.13|0.23	-0.01|0.02	-0.15|0.26	0.3|0.3	0.04|0.04	0.16|0.16	0.17|0.17	0.5|0.5	0.09|0.09	0.22|0.22	0.01|0.01	0.41|0.41
37	LD-b_5H_37	5H_149723576_5H_289442002_5H_312588343_5H_323619046	5H	149723576|289442002|312588343|323619046	C/C A/A C/C G/G|T/T T/T T/T A/A	75|12	0	0	0	0	0	0	0	0	0	0	0.2|-1.24	0.02|-0.15	0.07|-0.46	0.05|-0.3	0.09|-0.59	-0.03|0.17	0.02|-0.1	0|-0.03	0.26|-1.61	0.43|0.43	0.06|0.06	0.23|0.23	0.23|0.23	0.69|0.69	0.13|0.13	0.3|0.3	0.02|0.02	0.57|0.57
38	LD-b_5H_38	5H_607882621_5H_614933810_5H_618626656_5H_618631665_5H_646078909	5H	607882621|614933810|618626656|618631665|646078909	C/C G/G G/G T/T T/T|T/T C/C A/A C/C G/G|T/T C/C A/A C/C T/T	8|112|8	0	0	0	0	0	0	0	0	0	0	0.31|-0.03|0.16	0.17|-0.02|0.12	-0.03|0|0.09	0.15|0.01|-0.28	2.12|-0.49|4.77	0.24|-0.03|0.13	-0.82|0.13|-0.97	-0.06|0.01|-0.04	-1.48|0.09|0.21	0.92|0.62|1.12	0.14|0.09|0.17	0.47|0.32|0.58	0.49|0.33|0.6	1.47|1|1.8	0.26|0.17|0.32	0.63|0.43|0.77	0.04|0.03|0.05	1.19|0.8|1.45
39	LD-b_5H_39	5H_361208557_5H_370151491	5H	361208557|370151491	C/C C/C|T/T T/T	137|10	0	0	0	0	0	0	0	0	0	0	-0.02|0.21	-0.01|0.12	0.03|-0.36	0.02|-0.32	0|0	-0.04|0.49	-0.05|0.75	0|0.03	0.04|-0.5	0.47|0.47	0.07|0.07	0.23|0.23	0.24|0.24	0.74|0.74	0.13|0.13	0.32|0.32	0.02|0.02	0.6|0.6
40	LD-b_5H_40	5H_475160495_5H_480129120_5H_480634196_5H_480662223	5H	475160495|480129120|480634196|480662223	C/C G/G C/C A/A|T/T A/A T/T G/G|T/T G/G C/C A/A	94|32|9	0	0	0	0	0	0	0	0	0	0	0.2|-0.43|-0.56	0|0.01|-0.04	0.07|-0.22|0.01	0.13|-0.33|-0.19	0.24|-0.57|-0.5	0.06|-0.13|-0.21	0.16|-0.41|-0.16	0|0|-0.02	-0.29|0.91|-0.19	0.37|0.36|0.51	0.06|0.05|0.08	0.18|0.18|0.25	0.18|0.18|0.25	0.59|0.57|0.81	0.1|0.1|0.14	0.24|0.24|0.34	0.02|0.01|0.02	0.45|0.44|0.62
41	LD-b_5H_41	5H_559303229_5H_560970975	5H	559303229|560970975	C/C C/C|T/T T/T	122|26	0	0	0	0	0	0	0	0	0	0	-0.06|0.29	0.01|-0.04	0|0.02	-0.01|0.05	0.07|-0.34	-0.02|0.08	0|0	0|0.01	-0.09|0.44	0.26|0.25	0.04|0.04	0.13|0.13	0.13|0.13	0.41|0.4	0.07|0.07	0.18|0.17	0.01|0.01	0.32|0.32
42	LD-b_5H_42	5H_580419134_5H_580419135_5H_580902260_5H_580916818_5H_580916823_5H_580916852_5H_580934486_5H_580934607_5H_581759016	5H	580419134|580419135|580902260|580916818|580916823|580916852|580934486|580934607|581759016	C/C G/G T/T G/G C/C C/C C/C A/A G/G|T/T C/C C/C A/A T/T T/T G/G G/G A/A	29|78	0	1	0	0	0	0	0	0	0	1	0.17|-0.06	0.17|-0.06	-0.04|0.01	0.04|-0.02	-0.63|0.23	0.15|-0.05	-0.12|0.04	0|0	0.34|-0.13	0.25|0.24	0.04|0.04	0.13|0.12	0.13|0.12	0.39|0.37	0.07|0.07	0.18|0.17	0.01|0.01	0.3|0.28
43	LD-b_6H_43	6H_16697145_6H_16932119_6H_16937894_6H_16937899_6H_17192824_6H_17192853_6H_17194650_6H_31526533_6H_35340336_6H_36186002_6H_36195985	6H	16697145|16932119|16937894|16937899|17192824|17192853|17194650|31526533|35340336|36186002|36195985	A/A T/T A/A T/T C/C T/T C/C T/T T/T G/G C/C|G/G C/C G/G C/C T/T C/C A/A A/A A/A T/T G/G|G/G C/C G/G C/C T/T C/C A/A T/T T/T G/G C/C	10|72|10	0	0	0	0	0	0	0	0	0	0	-0.06|0.06|-0.39	-0.1|0.01|0.04	-0.01|0.07|-0.46	-0.09|0.1|-0.63	0.9|-0.39|1.93	0.22|0.02|-0.34	-0.31|0.08|-0.24	0|0|0	0.55|-0.21|0.99	0.82|0.62|0.97	0.12|0.09|0.14	0.41|0.31|0.49	0.41|0.31|0.48	1.08|0.81|1.27	0.22|0.17|0.26	0.5|0.37|0.59	0.03|0.02|0.04	0.92|0.69|1.09
44	LD-b_6H_44	6H_25285926_6H_25285956	6H	25285926|25285956	A/A G/G|G/G A/A	101|30	0	0	0	0	1	0	0	0	0	1	0.22|-0.73	0.03|-0.09	0.05|-0.17	0.04|-0.14	0.64|-2.16	0.07|-0.24	0.12|-0.41	0.01|-0.03	0.17|-0.58	0.21|0.21	0.03|0.03	0.11|0.11	0.12|0.12	0.33|0.33	0.06|0.06	0.14|0.14	0.01|0.01	0.29|0.29
45	LD-b_6H_45	6H_32665001_6H_35766837	6H	32665001|35766837	A/A C/C|G/G A/A	23|79	0	0	0	0	0	0	0	0	0	0	0.72|-0.21	0.11|-0.03	0.07|-0.02	0.08|-0.02	1.59|-0.46	0.27|-0.08	-0.14|0.04	0|0	0.29|-0.08	0.31|0.31	0.04|0.04	0.16|0.16	0.16|0.16	0.45|0.45	0.09|0.09	0.22|0.22	0.01|0.01	0.41|0.41
46	LD-b_6H_46	6H_34143361_6H_34880435	6H	34143361|34880435	G/G G/G|T/T C/C	131|16	0	0	0	0	0	0	0	0	0	0	-0.06|0.47	-0.01|0.09	-0.02|0.17	-0.04|0.33	-0.13|1.06	-0.06|0.47	0.08|-0.63	0.01|-0.04	0.12|-0.96	0.42|0.42	0.06|0.06	0.21|0.21	0.21|0.21	0.65|0.65	0.12|0.12	0.29|0.29	0.02|0.02	0.54|0.54
47	LD-b_6H_47	6H_38404847_6H_38405951_6H_38408046_6H_42557425_6H_43956360_6H_44234721_6H_44247682_6H_44785469_6H_44785538_6H_44785542_6H_45240047_6H_45240071_6H_45240082_6H_46318484_6H_46548310_6H_46597108_6H_47271202_6H_47362441_6H_50004267_6H_60479902_6H_60479922_6H_61217720	6H	38404847|38405951|38408046|42557425|43956360|44234721|44247682|44785469|44785538|44785542|45240047|45240071|45240082|46318484|46548310|46597108|47271202|47362441|50004267|60479902|60479922|61217720	A/A A/A C/C A/A C/C T/T G/G C/C G/G A/A G/G T/T C/C T/T T/T G/G G/G G/G C/C G/G G/G C/C|G/G C/C T/T G/G A/A C/C T/T T/T C/C G/G A/A G/G T/T C/C G/G A/A C/C C/C T/T T/T A/A T/T	71|16	0	0	0	0	0	0	0	0	0	0	0.2|-0.89	0.01|-0.04	0|-0.01	-0.03|0.13	0.38|-1.69	-0.04|0.16	0.24|-1.06	0.01|-0.06	0.19|-0.83	0.52|0.52	0.07|0.07	0.27|0.27	0.27|0.27	0.8|0.8	0.13|0.13	0.32|0.32	0.02|0.02	0.62|0.62
48	LD-b_6H_48	6H_42055856_6H_61433305_6H_61740390_6H_66012052_6H_78007200_6H_86607372_6H_88746306_6H_88756361	6H	42055856|61433305|61740390|66012052|78007200|86607372|88746306|88756361	C/C C/C T/T C/C T/T T/T T/T C/C|T/T T/T G/G A/A G/G C/C A/A T/T	12|84	0	0	0	0	0	0	0	0	0	0	0.28|-0.04	0.01|0	0.14|-0.02	0.23|-0.03	1.14|-0.16	0.42|-0.06	-0.59|0.08	-0.03|0	-0.11|0.02	0.53|0.53	0.08|0.08	0.28|0.28	0.29|0.29	0.84|0.84	0.13|0.13	0.35|0.35	0.02|0.02	0.65|0.65
49	LD-b_6H_49	6H_58619384_6H_60257489_6H_60257495_6H_60392776_6H_65602321_6H_71682620_6H_114729800_6H_115087828_6H_134110415_6H_141384707_6H_156952282	6H	58619384|60257489|60257495|60392776|65602321|71682620|114729800|115087828|134110415|141384707|156952282	A/A T/T G/G T/T A/A T/T C/C G/G G/G T/T G/G|G/G G/G C/C C/C G/G C/C T/T T/T A/A C/C A/A|G/G G/G C/C C/C G/G C/C T/T T/T G/G T/T A/A	16|104|17	0	0	0	0	0	0	0	0	0	0	0.16|0.01|-0.19	0.07|0|-0.05	0|-0.03|0.19	-0.05|-0.03|0.21	1.21|-0.19|0.05	0.29|0|-0.25	-0.67|0.05|0.35	-0.03|0.01|-0.02	0.12|0.29|-1.9	0.56|0.35|0.45	0.08|0.05|0.07	0.28|0.18|0.23	0.29|0.18|0.23	0.85|0.53|0.68	0.16|0.1|0.12	0.37|0.23|0.3	0.02|0.01|0.02	0.67|0.42|0.54
50	LD-b_6H_50	6H_566448983_6H_566449005_6H_571451899_6H_572205066	6H	566448983|566449005|571451899|572205066	T/C C/T A/A C/C|T/T C/C A/A C/C	89|12	0	0	0	0	0	0	0	0	0	0	0.02|-0.13	-0.01|0.08	0.09|-0.7	0.08|-0.59	-0.37|2.71	-0.02|0.17	-0.12|0.86	-0.01|0.07	-0.24|1.79	0.52|0.52	0.07|0.07	0.24|0.24	0.25|0.25	0.76|0.76	0.15|0.15	0.34|0.34	0.02|0.02	0.65|0.65
51	LD-b_7H_51	7H_26036393_7H_26036412	7H	26036393|26036412	C/C C/C|T/T G/G	105|43	0	0	0	0	1	0	0	0	0	1	0.14|-0.35	0.03|-0.07	-0.02|0.04	-0.02|0.06	0.66|-1.62	0.03|-0.08	0.01|-0.03	0|-0.01	0.24|-0.59	0.2|0.2	0.03|0.03	0.1|0.1	0.1|0.1	0.3|0.3	0.06|0.06	0.14|0.14	0.01|0.01	0.25|0.25
52	LD-b_7H_52	7H_620788874_7H_620942493_7H_621002881_7H_621003157_7H_621060494_7H_621064213_7H_621457481_7H_621834242_7H_621997750_7H_626403602_7H_626543422	7H	620788874|620942493|621002881|621003157|621060494|621064213|621457481|621834242|621997750|626403602|626543422	C/C T/T C/C G/G G/G G/G A/A A/A T/T T/T C/C|G/G C/C T/T A/A A/A A/A G/G G/G C/C G/G A/A	37|56	0	0	0	0	1	0	0	0	0	1	0.35|-0.23	0.07|-0.05	-0.15|0.1	-0.1|0.07	1.71|-1.13	0.18|-0.12	0.48|-0.32	0.04|-0.02	0.79|-0.52	0.27|0.26	0.04|0.04	0.13|0.13	0.13|0.13	0.41|0.4	0.08|0.08	0.2|0.2	0.01|0.01	0.37|0.36
53	LD-b_7H_53	7H_36302019_7H_36302033	7H	36302019|36302033	C/C C/C|C/T C/G|T/T G/G	66|49|16	0	1	0	0	0	0	0	0	0	1	0.27|-0.25|-0.35	0.07|-0.02|-0.23	0.09|-0.1|-0.06	0.12|-0.16|0	0.06|-0.31|0.68	0.13|-0.11|-0.2	-0.08|0.09|0.07	-0.01|0.01|0	-0.26|0.46|-0.35	0.29|0.29|0.37	0.04|0.04|0.05	0.14|0.14|0.18	0.15|0.15|0.19	0.47|0.48|0.61	0.08|0.08|0.11	0.2|0.2|0.26	0.01|0.01|0.02	0.37|0.37|0.48
54	LD-b_7H_54	7H_76856069_7H_76856085_7H_76872627_7H_78955725_7H_79246792_7H_79326326_7H_81170183_7H_81387800_7H_81387834_7H_82072318_7H_85269303_7H_85269310_7H_89767370_7H_94105246_7H_95754620_7H_98367687	7H	76856069|76856085|76872627|78955725|79246792|79326326|81170183|81387800|81387834|82072318|85269303|85269310|89767370|94105246|95754620|98367687	G/G A/A C/C G/G G/G C/C A/A G/G G/G C/C G/G G/G G/G C/C G/G C/C|T/T G/G T/T C/C A/A G/G T/T C/C C/C G/G A/A A/A T/T T/T C/C G/G	91|9	0	0	0	0	0	0	0	0	0	0	0.02|-0.16	0.01|-0.08	-0.04|0.44	-0.06|0.57	0.1|-1.05	-0.03|0.31	0.04|-0.36	0.01|-0.07	0.3|-2.99	0.62|0.62	0.1|0.1	0.3|0.3	0.3|0.3	1.02|1.02	0.19|0.19	0.43|0.43	0.03|0.03	0.77|0.77
55	LD-b_7H_55	7H_517981763_7H_517981795_7H_518604429_7H_519723675_7H_520951468_7H_522785486	7H	517981763|517981795|518604429|519723675|520951468|522785486	C/C G/G G/G G/G A/A C/C|T/T C/C C/C A/A A/A C/C|T/T C/C C/C A/A G/G T/T	49|9|77	0	0	0	0	1	0	0	0	0	1	0.27|-1.31|-0.02	-0.01|-0.13|0.02	0.25|-0.66|-0.08	0.21|-0.55|-0.07	-1.26|3.09|0.44	-0.01|-0.05|0.01	0.16|0.07|-0.11	0.01|-0.01|-0.01	0.29|-0.69|-0.1	0.34|0.48|0.31	0.05|0.07|0.05	0.16|0.23|0.15	0.17|0.24|0.16	0.52|0.74|0.48	0.1|0.14|0.09	0.24|0.34|0.22	0.01|0.02|0.01	0.42|0.6|0.39
56	LD-b_7H_56	7H_614663046_7H_615135723	7H	614663046|615135723	A/A A/A|G/G T/T	19|84	0	0	0	0	0	0	0	0	0	0	-0.27|0.06	-0.01|0	-0.03|0.01	-0.11|0.02	-0.75|0.17	0.02|0	-0.24|0.05	-0.03|0.01	-1.11|0.25	0.28|0.28	0.04|0.04	0.13|0.13	0.14|0.14	0.45|0.45	0.08|0.08	0.2|0.2	0.01|0.01	0.36|0.36
57	LD-b_7H_57	7H_588191147_7H_589469971_7H_589913957_7H_590153993_7H_590173619	7H	588191147|589469971|589913957|590153993|590173619	C/C T/T T/T G/G T/T|T/T C/C C/C A/A C/C	42|96	0	0	0	0	0	0	0	0	0	0	0.36|-0.16	-0.02|0.01	0.19|-0.08	0.14|-0.06	-0.96|0.42	0.03|-0.01	-0.02|0.01	0|0	-0.03|0.02	0.22|0.22	0.03|0.03	0.11|0.11	0.11|0.11	0.34|0.34	0.06|0.06	0.15|0.15	0.01|0.01	0.28|0.28
58	LD-b_7H_58	7H_600891887_7H_604533359_7H_607372612	7H	600891887|604533359|607372612	G/G G/G C/C|T/T A/A A/A|T/T G/G A/A|T/T G/G C/C	78|10|15|9	0	1	0	0	1	0	1	1	0	4	0.4|-0.02|-1.55|-0.86	0.08|-0.12|-0.25|-0.12	-0.04|0.28|-0.18|0.33	-0.03|0.29|-0.12|0.17	0.9|-0.09|-3.15|-2.44	0.06|0.05|-0.12|-0.38	0.42|-0.15|-1.29|-1.31	0.03|-0.02|-0.06|-0.11	0.36|-0.89|0.33|-2.68	0.33|0.51|0.45|0.53	0.06|0.09|0.08|0.09	0.17|0.26|0.23|0.27	0.18|0.27|0.24|0.28	0.54|0.83|0.73|0.86	0.1|0.15|0.14|0.16	0.25|0.38|0.34|0.4	0.01|0.02|0.02|0.02	0.44|0.68|0.59|0.7
59	LD-b_Un_59	Un_97994253_Un_249764637_Un_249764669	Un	97994253|249764637|249764669	C/C A/A C/C|C/C G/G T/T|G/G A/A C/C|G/G G/G T/T	21|86|11|18	0	0	0	0	1	0	0	1	0	2	-0.49|0.28|-1.6|0.23	-0.07|0.04|-0.2|0.02	-0.14|0|-0.24|0.34	-0.1|-0.01|-0.19|0.3	-1.65|0.78|-3.87|0.54	-0.22|0.05|-0.32|0.23	-0.21|0.31|-1.19|-0.52	-0.01|0.02|-0.08|-0.03	0.01|0.3|-1.29|-0.63	0.4|0.33|0.52|0.5	0.06|0.05|0.08|0.08	0.2|0.17|0.26|0.25	0.21|0.17|0.27|0.26	0.59|0.49|0.77|0.74	0.11|0.09|0.15|0.14	0.27|0.22|0.35|0.34	0.02|0.01|0.02|0.02	0.5|0.42|0.66|0.63
